# Supplementary material for: Are Quasi-Steady-State Approximated Models Suitable for Quantifying Intrinsic Noise Accurately?
Source: PLoS One. 2015 Sep 1;10(9):e0136668. doi: 10.1371/journal.pone.0136668 (PMC4556639; doi:10.1371/journal.pone.0136668)
Supplement: S8 Table — [S9A and S9B Fig]. (DOCX) [file pone.0136668.s019.docx]

**S8 Table. Equations and parameters of the additional positive feedback on Protein level (Module 2). [S9 (A) and (B) Figs.]**

QSSA and Mechanistic models: equations

| QSSA model | Mechanistic model |
| --- | --- |
|  |  |

QSSA and Mechanistic models: parameters

| **Parameters** | **Values** |
| --- | --- |
| *J0 = J4* | 1.0E-04 min-1 |
| *J1 = J5* | 43.838 min-1 |
| *J3 = J6* | 9.22E-04 min-1 |
| *k1 = k1s* | 4.0E-01 molecule-1min-1 |
| *k2 = k2s* | 81.31 min-1 |
| *ka = kas* | 8.0 min-1 |
| *kd = kds* | 5.0 min-1 |
| *km = kym* | 1.0E-01 min-1 |
| *kp = kyp* | 1.0E-03 min-1 |
| *ke* | 4.0E-01 molecule-1min-1 |
| *kf* | 81.31 min-1 |
| *Kn* | 5E-05 min-1 |
| Gt = Gts | 1 molecule |
